# Supplementary material for: Close neighbors, not intruders: investigating the role of tank bromeliads in shaping faunal microbiomes
Source: PeerJ. 2025 May 9;13:e19376. doi: 10.7717/peerj.19376 (PMC12068248; doi:10.7717/peerj.19376)
Supplement: Supplemental Information 2 [file peerj-13-19376-s002.xlsx]

## Sheet: Enriched microbial phyla
Enriched microbial phyla in bromeliad tanks and in two Diptera taxa	.	.	.	.	.
Marker	feature	enrich_group	ef_lda	pvalue	padj
marker7	Planctomycetes	Bromeliad	4.15683	6.91e-08	6.91e-08
marker14	Elusimicrobia	Bromeliad	3.24901	6.91e-08	6.91e-08
marker5	Acidobacteria	Bromeliad	5.21903	1.05e-07	1.05e-07
marker8	Spirochaetes	Bromeliad	4.13205	1.59e-07	1.59e-07
marker9	Fibrobacteres	Bromeliad	3.67511	3.28e-07	3.28e-07
marker11	FCPU426	Bromeliad	3.38792	3.28e-07	3.28e-07
marker6	Verrucomicrobia	Bromeliad	4.75874	4.48e-07	4.48e-07
marker12	Dependentiae	Bromeliad	3.30168	1.44e-06	1.44e-06
marker16	BRC1	Bromeliad	3.17168	1.44e-06	1.44e-06
marker13	Chlamydiae	Bromeliad	3.26758	5.84e-06	5.84e-06
marker15	Chloroflexi	Bromeliad	3.19593	5.84e-06	5.84e-06
marker10	Patescibacteria	Bromeliad	3.59819	7.58e-06	7.58e-06
marker17	Hydrogenedentes	Bromeliad	3.11329	0.00027594	0.00027594
marker20	FBP	Bromeliad	2.84848	0.000790408	0.000790408
marker21	WPS-2	Bromeliad	2.79638	0.00635682	0.00635682
marker18	Kiritimatiellaeota	Bromeliad	2.90602	0.0166172	0.0166172
marker19	Nitrospirae	Bromeliad	2.87646	0.0166172	0.0166172
marker3	Actinobacteria	Austrophorocera	4.72294	0.00105389	0.00105389
marker2	Bacteroidetes	Austrophorocera	4.80479	0.00241454	0.00241454
marker4	p__	Austrophorocera	4.08484	0.00347412	0.00347412
marker1	Proteobacteria	Austrophorocera	4.87514	0.0100597	0.0100597
marker25	Lentisphaerae	Copestylum	3.5058	1.95e-06	1.95e-06
marker22	Firmicutes	Copestylum	5.26528	2.34e-06	2.34e-06
marker23	Epsilonbacteraeota	Copestylum	3.52736	0.000148916	0.000148916
marker24	Tenericutes	Copestylum	3.52107	0.000685397	0.000685397

## Sheet: Enriched microbial families
Enriched microbial families in bromeliad tanks and in two Diptera taxa		.	.	.	.
Marker	feature	enrich_group	ef_lda	pvalue	padj
marker33	WD2101 soil group	Bromeliad	4.01892	6.91e-08	6.91e-08
marker35	Xanthobacteraceae	Bromeliad	3.93986	6.91e-08	6.91e-08
marker38	Acidobacteriales_uncultured	Bromeliad	3.82588	6.91e-08	6.91e-08
marker40	Chthoniobacteraceae	Bromeliad	3.63982	6.91e-08	6.91e-08
marker51	Actinobacteria_o___f__	Bromeliad	3.35997	6.91e-08	6.91e-08
marker56	BIrii41	Bromeliad	3.31513	6.91e-08	6.91e-08
marker62	Proteobacteria_c___o___f__	Bromeliad	3.19316	6.91e-08	6.91e-08
marker24	Pedosphaeraceae	Bromeliad	4.56527	9.48e-08	9.48e-08
marker23	Solibacteraceae (Subgroup 3)	Bromeliad	4.58924	9.6e-08	9.6e-08
marker22	Acidobacteriaceae (Subgroup 1)	Bromeliad	4.86282	1.46e-07	1.46e-07
marker31	Micropepsaceae	Bromeliad	4.11919	1.56e-07	1.56e-07
marker30	Spirochaetaceae	Bromeliad	4.12193	1.59e-07	1.59e-07
marker25	Koribacteraceae	Bromeliad	4.3389	1.78e-07	1.78e-07
marker37	SB-5	Bromeliad	3.85819	2.26e-07	2.26e-07
marker28	Holophagaceae	Bromeliad	4.21792	2.68e-07	2.68e-07
marker34	Magnetospirillaceae	Bromeliad	3.94167	2.85e-07	2.85e-07
marker42	0319-6G20	Bromeliad	3.62364	3.28e-07	3.28e-07
marker46	Fibrobacteraceae	Bromeliad	3.46305	3.28e-07	3.28e-07
marker47	Unknown Family	Bromeliad	3.44065	3.28e-07	3.28e-07
marker49	P3OB-42	Bromeliad	3.40457	3.28e-07	3.28e-07
marker52	Parcubacteria_uncultured bacterium_uncultured bacterium	Bromeliad	3.34775	3.28e-07	3.28e-07
marker54	Acidobacteriales_f__	Bromeliad	3.33227	3.28e-07	3.28e-07
marker55	Cytophagaceae	Bromeliad	3.33085	3.28e-07	3.28e-07
marker57	vadinHA49_uncultured soil bacterium_uncultured soil bacterium	Bromeliad	3.30304	3.28e-07	3.28e-07
marker58	Lentimicrobiaceae	Bromeliad	3.26394	3.28e-07	3.28e-07
marker60	67-14	Bromeliad	3.22773	3.28e-07	3.28e-07
marker63	Heliobacteriaceae	Bromeliad	3.18205	3.28e-07	3.28e-07
marker77	Oligoflexaceae	Bromeliad	3.01053	3.28e-07	3.28e-07
marker64	env.OPS 17	Bromeliad	3.1478	1.44e-06	1.44e-06
marker67	Methylacidiphilaceae	Bromeliad	3.09866	1.44e-06	1.44e-06
marker69	Sphingobacteriales_uncultured	Bromeliad	3.08076	1.44e-06	1.44e-06
marker72	Coxiellaceae	Bromeliad	3.06471	1.44e-06	1.44e-06
marker75	Subgroup 2_f__	Bromeliad	3.04567	1.44e-06	1.44e-06
marker76	B122	Bromeliad	3.04499	1.44e-06	1.44e-06
marker39	Archangiaceae	Bromeliad	3.7751	1.75e-06	1.75e-06
marker32	Paludibacteraceae	Bromeliad	4.07348	2.06e-06	2.06e-06
marker44	Geobacteraceae	Bromeliad	3.57023	3.08e-06	3.08e-06
marker29	Opitutaceae	Bromeliad	4.19111	4.26e-06	4.26e-06
marker45	Polyangiaceae	Bromeliad	3.48179	5.03e-06	5.03e-06
marker66	FCPU426_uncultured bacterium_uncultured bacterium_uncultured bacterium	Bromeliad	3.11749	5.84e-06	5.84e-06
marker85	Alphaproteobacteria_uncultured_f__	Bromeliad	2.94833	5.84e-06	5.84e-06
marker90	Spirochaetes_c___o___f__	Bromeliad	2.91281	5.84e-06	5.84e-06
marker99	Bacteroidia_o___f__	Bromeliad	2.81488	5.84e-06	5.84e-06
marker26	Caulobacteraceae	Bromeliad	4.30156	5.96e-06	5.96e-06
marker41	Haliangiaceae	Bromeliad	3.62877	6.76e-06	6.76e-06
marker61	Deltaproteobacteria_o___f__	Bromeliad	3.22076	2.2e-05	2.2e-05
marker65	CWT CU03-E12	Bromeliad	3.12083	2.2e-05	2.2e-05
marker70	Bdellovibrionaceae	Bromeliad	3.07918	2.2e-05	2.2e-05
marker74	Subgroup 13_f__	Bromeliad	3.04811	2.2e-05	2.2e-05
marker79	Inquilinaceae	Bromeliad	3.00803	2.2e-05	2.2e-05
marker82	Gallionellaceae	Bromeliad	2.97874	2.2e-05	2.2e-05
marker88	Lineage IIa_uncultured soil bacterium_uncultured soil bacterium	Bromeliad	2.93039	2.2e-05	2.2e-05
marker91	Subgroup 18_o___f__	Bromeliad	2.91067	2.2e-05	2.2e-05
marker97	Anaerolineaceae	Bromeliad	2.84765	2.2e-05	2.2e-05
marker59	uncultured Acidobacteria bacterium	Bromeliad	3.2497	7.69e-05	7.69e-05
marker71	Phaselicystidaceae	Bromeliad	3.07106	7.75e-05	7.75e-05
marker78	possible family 01	Bromeliad	3.00908	7.75e-05	7.75e-05
marker80	Moraxellaceae	Bromeliad	3.00308	7.75e-05	7.75e-05
marker81	Reyranellaceae	Bromeliad	3.00063	7.75e-05	7.75e-05
marker83	vadinHA49_metagenome_metagenome	Bromeliad	2.95158	7.75e-05	7.75e-05
marker87	Parachlamydiaceae	Bromeliad	2.93711	7.75e-05	7.75e-05
marker92	Subgroup 13_uncultured bacterium	Bromeliad	2.89752	7.75e-05	7.75e-05
marker93	OPB56_f__	Bromeliad	2.88638	7.75e-05	7.75e-05
marker94	FCPU426_c___o___f__	Bromeliad	2.86927	7.75e-05	7.75e-05
marker102	uncultured soil bacterium PBS-III-29	Bromeliad	2.7917	7.75e-05	7.75e-05
marker104	Saccharimonadales_f__	Bromeliad	2.78634	7.75e-05	7.75e-05
marker27	Acetobacteraceae	Bromeliad	4.27562	0.000108308	0.000108308
marker36	Alphaproteobacteria_o___f__	Bromeliad	3.90342	0.000140375	0.000140375
marker73	Bacteroidetes vadinHA17	Bromeliad	3.04864	0.000255376	0.000255376
marker86	mle1-27	Bromeliad	2.9475	0.000255376	0.000255376
marker96	Verrucomicrobiaceae	Bromeliad	2.85435	0.000255376	0.000255376
marker98	uncultured organism	Bromeliad	2.82136	0.000255376	0.000255376
marker107	cvE6	Bromeliad	2.72898	0.000255376	0.000255376
marker68	Hydrogenedensaceae	Bromeliad	3.09036	0.00027594	0.00027594
marker50	WD260_uncultured bacterium	Bromeliad	3.39799	0.000430502	0.000430502
marker48	WD260_f__	Bromeliad	3.41119	0.000589068	0.000589068
marker84	Prolixibacteraceae	Bromeliad	2.94888	0.000790408	0.000790408
marker89	uncultured gamma proteobacterium	Bromeliad	2.91323	0.000790408	0.000790408
marker95	Ignavibacteriales_f__	Bromeliad	2.86763	0.000790408	0.000790408
marker103	UBA12409	Bromeliad	2.79128	0.000790408	0.000790408
marker105	uncultured proteobacterium	Bromeliad	2.75026	0.000790408	0.000790408
marker108	vadinHA49_o___f__	Bromeliad	2.7289	0.000790408	0.000790408
marker112	JG36-TzT-191_uncultured bacterium	Bromeliad	2.6946	0.000790408	0.000790408
marker116	Babeliales_uncultured bacterium	Bromeliad	2.68193	0.000790408	0.000790408
marker132	FBP_uncultured bacterium_uncultured bacterium_uncultured bacterium	Bromeliad	2.56875	0.000790408	0.000790408
marker43	Mycobacteriaceae	Bromeliad	3.57532	0.000998472	0.000998472
marker100	SR-FBR-L83	Bromeliad	2.81243	0.00230547	0.00230547
marker101	Babeliales_f__	Bromeliad	2.79783	0.00230547	0.00230547
marker106	Sandaracinaceae	Bromeliad	2.74762	0.00230547	0.00230547
marker111	Candidatus Shapirobacteria_f__	Bromeliad	2.6951	0.00230547	0.00230547
marker118	SHA-26_uncultured bacterium_uncultured bacterium	Bromeliad	2.66382	0.00230547	0.00230547
marker121	OPB56_uncultured bacterium	Bromeliad	2.65342	0.00230547	0.00230547
marker122	BRC1_uncultured bacterium_uncultured bacterium_uncultured bacterium	Bromeliad	2.65139	0.00230547	0.00230547
marker127	SC-I-84	Bromeliad	2.59598	0.00230547	0.00230547
marker53	uncultured forest soil bacterium	Bromeliad	3.34231	0.00370194	0.00370194
marker109	Saccharimonadales_uncultured soil bacterium	Bromeliad	2.72869	0.00635682	0.00635682
marker113	SM2D12	Bromeliad	2.69156	0.00635682	0.00635682
marker115	BD7-11_uncultured bacterium_uncultured bacterium	Bromeliad	2.68445	0.00635682	0.00635682
marker117	Lineage IV_uncultured bacterium	Bromeliad	2.67135	0.00635682	0.00635682
marker119	Myxococcales_f__	Bromeliad	2.65999	0.00635682	0.00635682
marker123	Myxococcales_uncultured	Bromeliad	2.64806	0.00635682	0.00635682
marker124	vadinHA49_uncultured bacterium_uncultured bacterium	Bromeliad	2.63128	0.00635682	0.00635682
marker126	KD4-96_o___f__	Bromeliad	2.59927	0.00635682	0.00635682
marker129	WPS-2_uncultured bacterium_uncultured bacterium_uncultured bacterium	Bromeliad	2.58444	0.00635682	0.00635682
marker134	uncultured Syntrophaceae bacterium	Bromeliad	2.55367	0.00635682	0.00635682
marker110	Rhodobacteraceae	Bromeliad	2.69805	0.0166172	0.0166172
marker114	Neisseriaceae	Bromeliad	2.68706	0.0166172	0.0166172
marker120	JG36-TzT-191_f__	Bromeliad	2.65944	0.0166172	0.0166172
marker128	Syntrophorhabdaceae	Bromeliad	2.59448	0.0166172	0.0166172
marker136	Lineage IIb_uncultured bacterium_uncultured bacterium	Bromeliad	2.54205	0.0166172	0.0166172
marker138	Thermodesulfovibrionia_uncultured_f__	Bromeliad	2.53086	0.0166172	0.0166172
marker143	WCHB1-41_f__	Bromeliad	2.50575	0.0166172	0.0166172
marker125	R7C24_f__	Bromeliad	2.61389	0.0412977	0.0412977
marker130	Solimonadaceae	Bromeliad	2.5802	0.0412977	0.0412977
marker131	Verrucomicrobia bacterium ADurb.Bin070	Bromeliad	2.57485	0.0412977	0.0412977
marker133	Microscillaceae	Bromeliad	2.56613	0.0412977	0.0412977
marker135	Lineage IV_f__	Bromeliad	2.54317	0.0412977	0.0412977
marker137	Elsteraceae	Bromeliad	2.53366	0.0412977	0.0412977
marker139	Diplorickettsiaceae	Bromeliad	2.52715	0.0412977	0.0412977
marker140	Obscuribacterales_f__	Bromeliad	2.51793	0.0412977	0.0412977
marker141	uncultured soil bacterium PBS-II-34	Bromeliad	2.51009	0.0412977	0.0412977
marker142	BRC1_c___o___f__	Bromeliad	2.50758	0.0412977	0.0412977
marker144	Vermiphilaceae	Bromeliad	2.50208	0.0412977	0.0412977
marker145	Cytophagales_f__	Bromeliad	2.49282	0.0412977	0.0412977
marker146	Paracaedibacteraceae	Bromeliad	2.46519	0.0412977	0.0412977
marker147	Obscuribacterales_uncultured bacterium	Bromeliad	2.45395	0.0412977	0.0412977
marker148	Ignavibacteriaceae	Bromeliad	2.45289	0.0412977	0.0412977
marker149	Syntrophobacteraceae	Bromeliad	2.41853	0.0412977	0.0412977
marker9	Rhizobiales Incertae Sedis	Austrophorocera	4.1592	7.06e-06	7.06e-06
marker7	Desulfovibrionaceae	Austrophorocera	4.35221	7.58e-06	7.58e-06
marker4	Rikenellaceae	Austrophorocera	4.45587	5.48e-05	5.48e-05
marker5	Burkholderiaceae	Austrophorocera	4.41664	9.48e-05	9.48e-05
marker15	Anaplasmataceae	Austrophorocera	3.74129	0.000459928	0.000459928
marker18	Sphingobacteriaceae	Austrophorocera	3.52846	0.00286214	0.00286214
marker12	Micrococcales_f__	Austrophorocera	3.93506	0.00288793	0.00288793
marker14	Enterococcaceae	Austrophorocera	3.76655	0.00296746	0.00296746
marker3	Microbacteriaceae	Austrophorocera	4.48925	0.00319088	0.00319088
marker6	Enterobacteriaceae	Austrophorocera	4.37954	0.00337315	0.00337315
marker10	p___c___o___f__	Austrophorocera	4.11932	0.00347412	0.00347412
marker8	Dysgonomonadaceae	Austrophorocera	4.3176	0.00421729	0.00421729
marker11	Rhodospirillaceae	Austrophorocera	4.03056	0.0054588	0.0054588
marker1	Beijerinckiaceae	Austrophorocera	4.72225	0.00554686	0.00554686
marker2	Chitinophagaceae	Austrophorocera	4.55092	0.00624044	0.00624044
marker13	Coriobacteriales Incertae Sedis	Austrophorocera	3.7814	0.00659699	0.00659699
marker17	Peptostreptococcaceae	Austrophorocera	3.61519	0.0092381	0.0092381
marker16	Streptococcaceae	Austrophorocera	3.71089	0.010814	0.010814
marker19	Midichloriaceae	Austrophorocera	3.48024	0.010814	0.010814
marker21	uncultured actinobacterium	Austrophorocera	3.2245	0.0174095	0.0174095
marker20	Chitinophagales_uncultured	Austrophorocera	3.31855	0.0228713	0.0228713
marker154	Bacteroidaceae	Copestylum	4.12185	2.71e-08	2.71e-08
marker157	Family XIII	Copestylum	3.85058	2.71e-08	2.71e-08
marker155	Clostridiales vadinBB60 group	Copestylum	3.94621	2.43e-07	2.43e-07
marker162	Propionibacteriales_f__	Copestylum	3.64435	2.43e-07	2.43e-07
marker158	Peptococcaceae	Copestylum	3.80848	1.95e-06	1.95e-06
marker164	Victivallaceae	Copestylum	3.47925	1.95e-06	1.95e-06
marker152	Lachnospiraceae	Copestylum	4.57284	5.78e-06	5.78e-06
marker150	Ruminococcaceae	Copestylum	4.86695	8.48e-06	8.48e-06
marker159	Bacteroidales_f__	Copestylum	3.751	5.34e-05	5.34e-05
marker169	Orbaceae	Copestylum	3.32593	9.04e-05	9.04e-05
marker151	Christensenellaceae	Copestylum	4.69492	0.000112689	0.000112689
marker165	Campylobacteraceae	Copestylum	3.47766	0.000148916	0.000148916
marker153	Propionibacteriaceae	Copestylum	4.24011	0.000191601	0.000191601
marker156	Pleomorphomonadaceae	Copestylum	3.93528	0.000221624	0.000221624
marker160	Clostridiales_f__	Copestylum	3.7149	0.000400711	0.000400711
marker171	Actinomycetaceae	Copestylum	3.20097	0.00052992	0.00052992
marker174	Candidatus Kaiserbacteria_metagenome	Copestylum	3.15376	0.00052992	0.00052992
marker166	Kineosporiaceae	Copestylum	3.43999	0.000631119	0.000631119
marker168	Syntrophomonadaceae	Copestylum	3.38744	0.000701085	0.000701085
marker167	Hyphomonadaceae	Copestylum	3.4315	0.00156396	0.00156396
marker172	Mollicutes RF39_f__	Copestylum	3.19923	0.00283168	0.00283168
marker175	DTU014_uncultured bacterium	Copestylum	3.12923	0.00283168	0.00283168
marker163	Nocardioidaceae	Copestylum	3.48128	0.00387429	0.00387429
marker170	Flavobacteriaceae	Copestylum	3.32192	0.00511612	0.00511612
marker161	Rhodocyclaceae	Copestylum	3.67407	0.00591648	0.00591648
marker173	uncultured Firmicutes bacterium	Copestylum	3.16041	0.0142483	0.0142483
marker176	Rhizobiaceae	Copestylum	3.10577	0.0294939	0.0294939
