# Supplementary material for: Close neighbors, not intruders: investigating the role of tank bromeliads in shaping faunal microbiomes
Source: PeerJ. 2025 May 9;13:e19376. doi: 10.7717/peerj.19376 (PMC12068248; doi:10.7717/peerj.19376)
Supplement: Supplemental Information 3 [file peerj-13-19376-s003.xlsx]

## Sheet: Shared taxa
Shared microbial taxa between bromeliads and fly larvae of two distinct taxa	.	.	.	.	.	.	.
Host species	ASV ID	Kingdom	Phylum	Class	Order	Family	Genus
Bromeliad_Austrophorocera	b28962cc9bb72ccbe5f51defc0acb4b0	D_0__Bacteria	D_1__Actinobacteria	D_2__Actinobacteria	D_3__Micrococcales	D_4__Microbacteriaceae	D_5__Microbacterium
Bromeliad_Austrophorocera	aa56687b2a70d0e01c311311d3ef236b	D_0__Bacteria	D_1__Bacteroidetes	D_2__Bacteroidia	D_3__Bacteroidales	D_4__Rikenellaceae	D_5__Alistipes
Bromeliad_Austrophorocera	ab9bb49ae52d466644779357b6593b39	D_0__Bacteria	D_1__Proteobacteria	D_2__Alphaproteobacteria	D_3__Rhizobiales	D_4__Beijerinckiaceae	D_5__uncultured
Bromeliad_Austrophorocera	987343a75b13c1704b7f63f69e46bba2	D_0__Bacteria	D_1__Bacteroidetes	D_2__Bacteroidia	D_3__Bacteroidales	D_4__Rikenellaceae	D_5__Rikenella
Bromeliad_Austrophorocera	3e898183f1d0cd772f8e4b543e331769	D_0__Bacteria	D_1__Proteobacteria	D_2__Alphaproteobacteria	D_3__Rhizobiales	D_4__Rhizobiales Incertae Sedis	D_5__uncultured
Bromeliad_Austrophorocera	b7fedfcb434d5faddf126ae974aa813a	D_0__Bacteria	D_1__Proteobacteria	D_2__Alphaproteobacteria	D_3__Rhodospirillales	D_4__Rhodospirillaceae	D_5__Phaeovibrio
Bromeliad__Copestylum	0103e179c406369103eb72cbf47655bd	D_0__Bacteria	D_1__Bacteroidetes	D_2__Bacteroidia	D_3__Chitinophagales	D_4__Chitinophagaceae	.
Bromeliad__Copestylum	01916f0bb1fdeb05661e042890249c12	D_0__Bacteria	D_1__Verrucomicrobia	D_2__Verrucomicrobiae	D_3__Pedosphaerales	D_4__Pedosphaeraceae	.
Bromeliad__Copestylum	04fc53c0719b6a8a5ed732d764d1a264	D_0__Bacteria	D_1__Proteobacteria	D_2__Alphaproteobacteria	D_3__Rhizobiales	D_4__Beijerinckiaceae	D_5__Roseiarcus
Bromeliad__Copestylum	0cb0a5da114a8df1cb2ebf3fa6946f0e	D_0__Bacteria	D_1__Proteobacteria	D_2__Alphaproteobacteria	D_3__Caulobacterales	D_4__Hyphomonadaceae	D_5__UKL13-1
Bromeliad__Copestylum	10b0ee842bd2a266f2ed278a514f2535	D_0__Bacteria	D_1__Acidobacteria	D_2__Acidobacteriia	D_3__Solibacterales	D_4__Solibacteraceae (Subgroup 3)	D_5__Bryobacter
Bromeliad__Copestylum	124d1e601e924a47ed1021185e2d9ff2	D_0__Bacteria	D_1__Acidobacteria	D_2__Acidobacteriia	D_3__Acidobacteriales	D_4__Koribacteraceae	D_5__Candidatus Koribacter
Bromeliad__Copestylum	143e2a7036bb1ce6adea44a036798a05	D_0__Bacteria	D_1__Proteobacteria	D_2__Alphaproteobacteria	D_3__Rhizobiales	D_4__Beijerinckiaceae	D_5__Roseiarcus
Bromeliad__Copestylum	1add140c0dda49396b213a1a459fb064	D_0__Bacteria	D_1__Spirochaetes	D_2__Spirochaetia	D_3__Spirochaetales	D_4__Spirochaetaceae	D_5__uncultured
Bromeliad__Copestylum	1b520c12acdbdd9cd7c1b2e7986c14ec	D_0__Bacteria	D_1__Bacteroidetes	D_2__Bacteroidia	D_3__Bacteroidales	D_4__SB-5	D_5__metagenome
Bromeliad__Copestylum	1e32bcb90d58399362c02ec766d4aea8	D_0__Bacteria	D_1__Acidobacteria	D_2__Acidobacteriia	D_3__Acidobacteriales	D_4__Acidobacteriaceae (Subgroup 1)	D_5__Occallatibacter
Bromeliad__Copestylum	23f155df9e1defba3dbd508a2a4ed266	D_0__Bacteria	D_1__Verrucomicrobia	D_2__Verrucomicrobiae	D_3__Pedosphaerales	D_4__Pedosphaeraceae	.
Bromeliad__Copestylum	25f15fbd95f5a5c7ac7682663f65adb2	D_0__Bacteria	D_1__Proteobacteria	D_2__Gammaproteobacteria	D_3__Betaproteobacteriales	D_4__Burkholderiaceae	.
Bromeliad__Copestylum	28961e228cba87bbfd4e476543f5fd5c	D_0__Bacteria	D_1__Proteobacteria	D_2__Alphaproteobacteria	D_3__Rhizobiales	D_4__Beijerinckiaceae	D_5__Roseiarcus
Bromeliad__Copestylum	2a045dc206a77ea5fa7c437d60b7576f	D_0__Bacteria	D_1__Proteobacteria	D_2__Gammaproteobacteria	D_3__Betaproteobacteriales	D_4__Burkholderiaceae	.
Bromeliad__Copestylum	2f2c5bb7cb2b5034dea439f1f2187704	D_0__Bacteria	D_1__Proteobacteria	D_2__Alphaproteobacteria	D_3__Rhizobiales	D_4__Beijerinckiaceae	D_5__Roseiarcus
Bromeliad__Copestylum	30a7dbc61e339574b8281811e4569bcb	D_0__Bacteria	D_1__Proteobacteria	D_2__Alphaproteobacteria	D_3__Sphingomonadales	D_4__Sphingomonadaceae	D_5__Novosphingobium
Bromeliad__Copestylum	34ef18d321e2adae8ce31f7c970c40eb	D_0__Bacteria	D_1__Verrucomicrobia	D_2__Verrucomicrobiae	D_3__Pedosphaerales	D_4__Pedosphaeraceae	.
Bromeliad__Copestylum	350cf91845c2c71c6f7a3685bdf18b64	D_0__Bacteria	D_1__Acidobacteria	D_2__Acidobacteriia	D_3__Acidobacteriales	D_4__Koribacteraceae	D_5__Candidatus Koribacter
Bromeliad__Copestylum	3cfe96edf5faa9e080919614f1a0f84c	D_0__Bacteria	D_1__Proteobacteria	D_2__Alphaproteobacteria	D_3__Rhizobiales	D_4__Beijerinckiaceae	.
Bromeliad__Copestylum	4b3a22d1b275549864596db3efda7ae8	D_0__Bacteria	D_1__Bacteroidetes	D_2__Bacteroidia	D_3__Chitinophagales	D_4__Chitinophagaceae	D_5__Ferruginibacter
Bromeliad__Copestylum	51399ea025909867fe3ea61ee6bf1ea4	D_0__Bacteria	D_1__Proteobacteria	D_2__Alphaproteobacteria	D_3__Rhizobiales	D_4__Rhodomicrobiaceae	D_5__Rhodomicrobium
Bromeliad__Copestylum	5474efcc78c0ea47f4a7eab12bdc6a77	D_0__Bacteria	D_1__Proteobacteria	D_2__Alphaproteobacteria	D_3__Sphingomonadales	D_4__Sphingomonadaceae	D_5__Novosphingobium
Bromeliad__Copestylum	567cbab36cb30ea16db8fec33b59dd06	D_0__Bacteria	D_1__Acidobacteria	D_2__Acidobacteriia	D_3__Solibacterales	D_4__Solibacteraceae (Subgroup 3)	D_5__Candidatus Solibacter
Bromeliad__Copestylum	5a0d76c964b024cd90a84436ea6b81d7	D_0__Bacteria	D_1__Proteobacteria	D_2__Alphaproteobacteria	D_3__Acetobacterales	D_4__Acetobacteraceae	.
Bromeliad__Copestylum	60b9dc822270dd462db1b03a5e7d19b3	D_0__Bacteria	D_1__Proteobacteria	D_2__Alphaproteobacteria	D_3__Rhizobiales	D_4__Beijerinckiaceae	D_5__Roseiarcus
Bromeliad__Copestylum	6436ac09effd9d92f0137f1aba3621d0	D_0__Bacteria	D_1__Actinobacteria	D_2__Thermoleophilia	D_3__Solirubrobacterales	D_4__Solirubrobacteraceae	D_5__Conexibacter
Bromeliad__Copestylum	64ff7390e09244dbb2cb58898d37de86	D_0__Bacteria	D_1__Proteobacteria	D_2__Alphaproteobacteria	D_3__Rhizobiales	D_4__Beijerinckiaceae	D_5__Roseiarcus
Bromeliad__Copestylum	6639ef19dd85835d0019f0d8a08d8112	D_0__Bacteria	D_1__Spirochaetes	D_2__Spirochaetia	D_3__Spirochaetales	D_4__Spirochaetaceae	D_5__uncultured
Bromeliad__Copestylum	75b798b6aede16c45658a2365ecf44c2	D_0__Bacteria	D_1__Proteobacteria	D_2__Alphaproteobacteria	D_3__Sphingomonadales	D_4__Sphingomonadaceae	.
Bromeliad__Copestylum	760c9eadadc2927c056891d4cb84fc5d	D_0__Bacteria	D_1__Acidobacteria	D_2__Acidobacteriia	D_3__Acidobacteriales	D_4__Koribacteraceae	D_5__Candidatus Koribacter
Bromeliad__Copestylum	76f60ff18e5dff8716a5d95bc403c8c3	D_0__Bacteria	D_1__Proteobacteria	D_2__Gammaproteobacteria	D_3__Betaproteobacteriales	D_4__Burkholderiaceae	.
Bromeliad__Copestylum	778fa622a47f3526b51fa3e7d7a52b06	D_0__Bacteria	D_1__Actinobacteria	D_2__Thermoleophilia	D_3__Solirubrobacterales	D_4__Solirubrobacteraceae	.
Bromeliad__Copestylum	78d0e2d1b1177d2fbd0a23d3511c61a9	D_0__Bacteria	D_1__Acidobacteria	D_2__Acidobacteriia	D_3__Acidobacteriales	D_4__Acidobacteriaceae (Subgroup 1)	D_5__Occallatibacter
Bromeliad__Copestylum	7d82778fa9523883c86a824d440b0c39	D_0__Bacteria	D_1__Acidobacteria	D_2__Acidobacteriia	D_3__Acidobacteriales	D_4__Acidobacteriaceae (Subgroup 1)	D_5__Occallatibacter
Bromeliad__Copestylum	8102663d43dd74cfadfbd9192f3dc12a	D_0__Bacteria	D_1__Proteobacteria	D_2__Alphaproteobacteria	D_3__Rhizobiales	D_4__Beijerinckiaceae	D_5__Roseiarcus
Bromeliad__Copestylum	8abc112dd12af7659af480d6da0954d6	D_0__Bacteria	D_1__Proteobacteria	D_2__Alphaproteobacteria	D_3__Rhizobiales	D_4__Beijerinckiaceae	D_5__Rhodoblastus
Bromeliad__Copestylum	91f39e729269534a3002fbc5c8023345	D_0__Bacteria	D_1__Proteobacteria	D_2__Deltaproteobacteria	D_3__Myxococcales	D_4__Archangiaceae	D_5__Anaeromyxobacter
Bromeliad__Copestylum	92531ae6cdf0833e469db89f05afef91	D_0__Bacteria	D_1__Bacteroidetes	D_2__Bacteroidia	D_3__Chitinophagales	D_4__Chitinophagaceae	D_5__uncultured
Bromeliad__Copestylum	94eb1a85074bd19b299b2bec494d22e8	D_0__Bacteria	D_1__Proteobacteria	D_2__Alphaproteobacteria	D_3__Rhizobiales	D_4__Beijerinckiaceae	D_5__Roseiarcus
Bromeliad__Copestylum	9c6bfc5892634a395eea627d0b8bde1f	D_0__Bacteria	D_1__Actinobacteria	D_2__Actinobacteria	D_3__Propionibacteriales	D_4__Propionibacteriaceae	.
Bromeliad__Copestylum	9f426edc07bf3f0279455088cbb8f4c1	D_0__Bacteria	D_1__Verrucomicrobia	D_2__Verrucomicrobiae	D_3__Opitutales	D_4__Opitutaceae	D_5__Lacunisphaera
Bromeliad__Copestylum	a006582121a37ee6664203ca96f8db92	D_0__Bacteria	D_1__Acidobacteria	D_2__Acidobacteriia	D_3__Solibacterales	D_4__Solibacteraceae (Subgroup 3)	D_5__Paludibaculum
Bromeliad__Copestylum	a272a4b39741f11292913c5ac75aee58	D_0__Bacteria	D_1__Bacteroidetes	D_2__Bacteroidia	D_3__Bacteroidales	D_4__Paludibacteraceae	.
Bromeliad__Copestylum	a60f705c98f4e566d55d6c9eab49e90b	D_0__Bacteria	D_1__Proteobacteria	D_2__Alphaproteobacteria	D_3__Rhizobiales	D_4__Beijerinckiaceae	D_5__Roseiarcus
Bromeliad__Copestylum	b02b361627c9720576ec94dbe0797c00	D_0__Bacteria	D_1__Actinobacteria	D_2__Actinobacteria	D_3__Propionibacteriales	D_4__Propionibacteriaceae	.
Bromeliad__Copestylum	b53a427f1096e6287afced3b96504b7c	D_0__Bacteria	D_1__Bacteroidetes	D_2__Bacteroidia	D_3__Bacteroidales	D_4__Paludibacteraceae	.
Bromeliad__Copestylum	b5ac21d7e177b00324d6c1748395fc99	D_0__Bacteria	D_1__Proteobacteria	D_2__Alphaproteobacteria	D_3__Rhizobiales	D_4__Beijerinckiaceae	D_5__Roseiarcus
Bromeliad__Copestylum	bd857e86c2be0097338306fd20cb2965	D_0__Bacteria	D_1__Proteobacteria	D_2__Alphaproteobacteria	D_3__Rhizobiales	D_4__Beijerinckiaceae	D_5__Roseiarcus
Bromeliad__Copestylum	c1c61823ec807381df0ed1a90623d1fd	D_0__Bacteria	D_1__Epsilonbacteraeota	D_2__Campylobacteria	D_3__Campylobacterales	D_4__Campylobacteraceae	D_5__Campylobacter
Bromeliad__Copestylum	c87565342fe1ec936ab7430832ec0586	D_0__Bacteria	D_1__Proteobacteria	D_2__Alphaproteobacteria	D_3__Acetobacterales	D_4__Acetobacteraceae	.
Bromeliad__Copestylum	d73147a303c07a4ce408548b9aa32c1c	D_0__Bacteria	D_1__Acidobacteria	D_2__Acidobacteriia	D_3__Acidobacteriales	D_4__Koribacteraceae	D_5__Candidatus Koribacter
Bromeliad__Copestylum	d744c00d421750bbf8f4258c80a69a8a	D_0__Bacteria	D_1__Acidobacteria	D_2__Acidobacteriia	D_3__Solibacterales	D_4__Solibacteraceae (Subgroup 3)	D_5__Bryobacter
Bromeliad__Copestylum	deb0437721505fa11a946f512bbfb34a	D_0__Bacteria	D_1__Proteobacteria	D_2__Gammaproteobacteria	D_3__Betaproteobacteriales	D_4__Burkholderiaceae	.
Bromeliad__Copestylum	e49474dd809fd29ead5a53a5a017f810	D_0__Bacteria	D_1__Proteobacteria	D_2__Alphaproteobacteria	D_3__Acetobacterales	D_4__Acetobacteraceae	.
Bromeliad__Copestylum	e4b86b1a3981c123765c4c0ea03c6ec6	D_0__Bacteria	D_1__Actinobacteria	D_2__Acidimicrobiia	D_3__uncultured	D_4__uncultured actinobacterium	D_5__uncultured actinobacterium
Bromeliad__Copestylum	ec0a01cf57bf793ae033d891008b37ab	D_0__Bacteria	D_1__Proteobacteria	D_2__Alphaproteobacteria	D_3__Rhizobiales	D_4__Beijerinckiaceae	D_5__Roseiarcus
Bromeliad__Copestylum	f44ba5f33b777f4d14fe4999252c59d3	D_0__Bacteria	D_1__Spirochaetes	D_2__Spirochaetia	D_3__Spirochaetales	D_4__Spirochaetaceae	D_5__uncultured
Bromeliad__Copestylum	febcbad776a70ebe0fc4092d333ae929	D_0__Bacteria	D_1__Acidobacteria	D_2__Acidobacteriia	D_3__Acidobacteriales	D_4__Acidobacteriaceae (Subgroup 1)	D_5__Granulicella
Austrophorocera__Copestylum	22d6f1b927edc46c54634691d8ba5621	D_0__Bacteria	D_1__Firmicutes	D_2__Clostridia	D_3__Clostridiales	D_4__Christensenellaceae	D_5__Christensenellaceae R-7 group
Austrophorocera__Copestylum	9cc26fc8158ce92517770631095adb95	D_0__Bacteria	D_1__Proteobacteria	D_2__Alphaproteobacteria	D_3__Rhizobiales	D_4__Rhizobiales Incertae Sedis	D_5__uncultured
Austrophorocera__Copestylum	cd72bbd88378d840f0bcba4ff9a894bb	D_0__Bacteria	D_1__Proteobacteria	D_2__Deltaproteobacteria	D_3__Desulfovibrionales	D_4__Desulfovibrionaceae	D_5__Desulfovibrio
Austrophorocera__Copestylum	cae9bb4a25c691d554bddc79cc47019d	D_0__Bacteria	D_1__Proteobacteria	D_2__Alphaproteobacteria	D_3__Rhizobiales	D_4__Beijerinckiaceae	D_5__Rhodoblastus
Bromeliad__Austrophorocera__Copestylum	e0f861b3d82977f239c17faca54f7514	D_0__Bacteria	D_1__Bacteroidetes	D_2__Bacteroidia	D_3__Chitinophagales	D_4__Chitinophagaceae	D_5__uncultured
Bromeliad__Austrophorocera__Copestylum	088403b4941320040b40f1312a9befbd	D_0__Bacteria	D_1__Bacteroidetes	D_2__Bacteroidia	D_3__Bacteroidales	D_4__Dysgonomonadaceae	D_5__Dysgonomonas
Bromeliad__Austrophorocera__Copestylum	c9f81a2020bd648a8123d0f0475d585d	D_0__Bacteria	D_1__Proteobacteria	D_2__Gammaproteobacteria	D_3__Enterobacteriales	D_4__Enterobacteriaceae	.
Bromeliad__Austrophorocera__Copestylum	59d471da0573b4790186215910606d10	D_0__Bacteria	D_1__Proteobacteria	D_2__Alphaproteobacteria	D_3__Rhizobiales	D_4__Beijerinckiaceae	D_5__Roseiarcus
Bromeliad__Austrophorocera__Copestylum	1a46325e1eb7bd8e56eed1634be88a8b	D_0__Bacteria	D_1__Bacteroidetes	D_2__Bacteroidia	D_3__Chitinophagales	D_4__Chitinophagaceae	D_5__uncultured
Bromeliad__Austrophorocera__Copestylum	4867af138d2fcf871183e73469484271	D_0__Bacteria	D_1__Proteobacteria	D_2__Gammaproteobacteria	D_3__Betaproteobacteriales	D_4__Burkholderiaceae	D_5__Variovorax
Bromeliad__Austrophorocera__Copestylum	97f06da26c6d28f95e63ed5156fbf37c	D_0__Bacteria	D_1__Proteobacteria	D_2__Alphaproteobacteria	D_3__Acetobacterales	D_4__Acetobacteraceae	.
